# Supplementary material for: Integrated analysis of microRNA and mRNA expression profiling identifies BAIAP3 as a novel target of dysregulated hsa-miR-1972 in age-related white matter lesions
Source: publisher site journal article supplement (doi:10.18632/aging.202562), 2021-02-09
Supplement: Supplementary file [file aging-v13i3-202562-supplementary-material-SD2.pdf]

## SUPPLEMENTARY TABLE

**Supplementary Table 1. Clinical details of the subjects used in the miRNA microarray study.**

| Subjects | Label         | Age (years old) | Hypertension | Diabetes | Smoking | Drinking | LDL-C (mmol/L) | HCY (μmol/L) | TG (mmol/L) | HCRP (mg/L) | CRE (umol/L) | UA (umol/L) | APOA1 (g/L) | ApoB (g/L) | MRI        |
|----------|---------------|-----------------|--------------|----------|---------|----------|----------------|--------------|-------------|-------------|--------------|-------------|-------------|------------|------------|
| 1        | <b>B1BD05</b> | 70-75           | -            | -        | -       | -        | 3.14           | 8.55         | 0.65        | 2.7         | 79           | 325         | 1.18        | 0.89       | Normal     |
| 2        | <b>B1BD08</b> | 70-75           | -            | -        | -       | -        | 3.65           | 18.93        | 1.38        | 3.0         | 95           | 303         | 1.20        | 0.95       |            |
| 3        | <b>B1BD12</b> | 70-75           | -            | -        | +       | -        | 2.95           | 14.77        | 1.18        | 4.2         | 107          | 273         | 1.00        | 0.74       |            |
| 4        | <b>B1BE04</b> | 60-65           | -            | -        | +       | -        | 2.89           | 10.29        | 0.65        | 10.9        | 100          | 309         | 0.80        | 1.26       | LA Type I  |
| 5        | <b>B1BE09</b> | 60-65           | -            | -        | +       | -        | 1.83           | 19.61        | 0.65        | 12.3        | 99           | 237         | 1.18        | 0.55       |            |
| 6        | <b>B1BE12</b> | 70-75           | -            | -        | -       | -        | 3.95           | 37.93        | 0.94        | 2.1         | 102          | 291         | 1.08        | 0.91       |            |
| 7        | <b>B1BF04</b> | 60-65           | -            | -        | +       | +        | 3.13           | 14.81        | 1.28        | 6.1         | 90           | 283         | 1.09        | 0.87       | LA Type II |
| 8        | <b>B1BF08</b> | 66-70           | -            | -        | -       | -        | 2.15           | 13.17        | 0.95        | 20.1        | 79           | 299         | 0.76        | 0.73       |            |
| 9        | <b>B1BF12</b> | 80-85           | -            | -        | -       | -        | 2.98           | 26.95        | 0.88        | 4.8         | 101          | 322         | 1.10        | 0.96       |            |

Note: LDL-C: low density lipoprotein cholesterol (range of normal level: 2.07~3.36 mmol/L); HCY: homocysteine (range of normal level: 0~15μmol/L); TG: Triglyceride (range of normal level: 0.5~1.7 mmol/L); HCRP: high-sensitivity C-reactive protein (range of normal level: 0~5 mg/L); CRE: Creatinine (range of normal level: 44~133 umol/L); UA: uric acid (range of normal level: 88~430 umol/L); ApoA1: Apolipoprotein A1(range of normal level: 1.1~1.6 g/L); ApoB: Apolipoprotein B (range of normal level: 0.6~1.1 g/L). LA: leukoaraiosis. Partial information of the supplemental table was cited from our published paper (Huang et al, Front Aging Neurosci. 2018; 10:143. <https://doi.org/10.3389/fnagi.2018.00143>).
